# Supplementary material for: Multiplatform molecular profiling identifies potentially targetable biomarkers in malignant phyllodes tumors of the breast
Source: PubMed Central journal article supplement (PMC4811491; doi:10.18632/oncotarget.6421), 2015-11-28
Supplement: oncotarget-07-1707-s001.pdf [file oncotarget-07-1707-s001.pdf]

## SUPPLEMENTARY TABLE

**Supplementary Table S1: List of significantly (2-fold) up- and downregulated genes in malignant phyllodes tumors of the breast.**
